# Supplementary material for: Effect of acid leaching on the denitrification efficiency of a MnCe@FA catalyst derived from fly ash: structure, crystal phase, active component interaction phase and active components
Source: Royal Society of Chemistry journal article supplement (doi:10.1039/d5nr00796h), 2025-01-01
Supplement: d5nr00796h1.pdf [file d5nr00796h1.pdf]

1     **Acid leaching on the denitrification efficiency of MnCe@FA**  
2     **catalyst derived from fly ash: Structure, crystal phase and active**  
3                     **component interaction**

4             Liguo Chen<sup>a†</sup>, Mutao Xu<sup>a,b†</sup>, Yongzhong Wang<sup>c</sup>, Qijie Jin<sup>a\*</sup>, Jing Song<sup>d</sup>,  
5                     Changcheng Zhou<sup>d</sup>, Jisai Chen<sup>c</sup>, Jian Yang<sup>b</sup>, Haitao Xu<sup>a,d\*</sup>

6     *a School of Environmental Science and Engineering, Nanjing Tech University,*  
7     *Nanjing 210009, PR China*

8     *b College of Materials Science and Engineering, Nanjing Tech University, Nanjing*  
9     *210009, PR China*

10    *c Kelin Environmental Protection Technology Co., Suzhou 215200, PR China*

11    *d Nanjing Gekof Institute of Environmental Protection Technology & Equipment Co.,*  
12    *Nanjing 210031, PR China*

13    *e CSSC Luzhou Environment Protection (Nanjing) Co., Nanjing 211100, PR China*

14

15    <sup>†</sup>These authors contributed equally to this work.

16    \*Corresponding authors: Haitao Xu, Qijie Jin

17    E-mail address: htxu@njtech.edu.cn, qijiejin@njtech.edu.cn

18

19

20

21

22 **Table of contents in Supporting Information:**

23 **Text 1. Experimental section**

24 Tab. S1 Comparison of the efficiency of transition metal and rare earth metal

25 composite denitrification catalysts

26 Tab. S2 Relative element content on the surface of 0.1MC@FA (1) catalyst

27 Fig. S1 Catalyst activity evaluation device diagram

28 Fig. S2 The elemental mappings of 0.1MC@FA(0) catalysts

29 Fig.S3 O<sub>2</sub> adsorption capacity of 0.1MC@FA catalyst

30 Fig. S4 H<sub>2</sub> consumption of 0.1MC@FA catalyst

31 Fig. S5 Denitration efficiency diagram of commercial low temperature denitration

32 catalyst

## 33 **Text 1. Experimental section**

### 34 **1. Chemicals and Materials**

35 All chemicals are purchased from the market and used directly without treatment.  
36 Copper nitrate trihydrate ( $\text{Ce}(\text{NO}_3)_3 \cdot 6\text{H}_2\text{O}$ ), manganese acetate tetrahydrate  
37  $(\text{CH}_3\text{COO})_2\text{Mn} \cdot 4\text{H}_2\text{O}$  and hydroxyethyl cellulose were purchased from Shanghai  
38 McLean Biochemical Technology Co., Ltd. The water used is deionized water  
39 prepared in the laboratory. The fly ash used in the experiment was taken from  
40 Taizhou Power Plant.

### 41 **2. Material characterization methods**

42 The X-ray diffraction (XRD) patterns were obtained using an X-ray diffractometer  
43 (Smartlab TM 3 kW, Rigaku). The scanning speed was  $10^\circ \cdot \text{min}^{-1}$ , and the  $2\theta$   
44 scanning range was  $10^\circ - 85^\circ$ . The microstructure and element mapping of the  
45 catalyst were studied by scanning electron microscopy (JEOL, JSM-5900). X-ray  
46 photoelectron spectroscopy (XPS) images were obtained by AXIS ULTRA DLD  
47 instrument (Al-K $\alpha$  radiation, 1486.6 eV), and the vacuum was maintained at  $10^{-7}$  Pa.  
48 The samples were dried at  $100^\circ\text{C}$ . for 24 h to remove water and then tested. The  
49 obtained curves were fitted using XPSPEAK 4.1 software. The  $\text{NH}_3$  temperature-  
50 programmed desorption ( $\text{NH}_3$ -TPD) test was performed on CHEMBET-3000  
51 (Quantachrome) to obtain the surface acidity of the catalyst. All catalysts were  
52 preheated at  $400^\circ\text{C}$ . for 1 h under helium flow and then cooled to  $50^\circ\text{C}$ . for  $\text{NH}_3$   
53 adsorption.  $\text{NH}_3$  was then desorbed from  $50^\circ\text{C}$  to  $900^\circ\text{C}$ . at a heating rate of  $10$   
54  $^\circ\text{C} \cdot \text{min}^{-1}$ .  $\text{H}_2$  temperature programmed reduction ( $\text{H}_2$ -TPR) was performed using a

55 semi-automatic Micromeritics TPD/TPR 2900 instrument. All catalysts were  
56 preheated at 400 °C for 1 h under argon flow and cooled to 50 °C. Then it was  
57 switched to 5 % H<sub>2</sub>/Ar and the temperature was increased from 50 °C to 800 °C at a  
58 heating rate of 10 °C·min<sup>-1</sup>. Data are collected over the entire temperature range. TG  
59 and DSC data were obtained using a thermogravimetric analyzer (TGA550, America).  
60 The heating rate was 10 °C·min<sup>-1</sup>, the protective atmosphere was air, and the airflow  
61 rate was 40 mL·min<sup>-1</sup>.

62 In situ diffuse reflectance infrared spectroscopy (in situ DRIFTS) was collected by  
63 Nicolet is 50 spectrometer. All catalysts were preheated at 400 °C for 2 h under  
64 nitrogen flow, and then cooled to the desired temperature. For NH<sub>3</sub> adsorption and  
65 NO + O<sub>2</sub> adsorption, when the temperature is cooled to 200 °C, 1000 ppm NH<sub>3</sub> or  
66 1000 ppm NO + 10 vol. % O<sub>2</sub> is pumped into the system for 30 min. Then the in situ  
67 DRIFT spectra were collected with increasing temperature. For the reaction of NH<sub>3</sub>  
68 and pre-adsorbed NO + O<sub>2</sub>, 1000 ppm NO + 10 vol. % O<sub>2</sub> was pumped into the  
69 system for 30 min. After the temperature rises to 400 °C., the flow of NO + O<sub>2</sub> is  
70 stopped and N<sub>2</sub> is pumped into the system for 30 min. Then, 1000 ppm NH<sub>3</sub> was  
71 pumped into the system and in situ DRIFT spectra were collected with increasing  
72 temperature. For the reaction between NO + O<sub>2</sub> and pre-adsorbed NH<sub>3</sub>, the gas order  
73 is opposite, but the steps are similar to the reaction between NH<sub>3</sub> and pre-adsorbed  
74 NO + O<sub>2</sub>.

### 75 **3 Catalyst activity test**

76 The catalyst (1 ml) was added to a fixed-bed quartz reactor (inner diameter 8 mm,

as shown in Fig. S1) to study the NH<sub>3</sub>-SCR catalytic activity. The gas flow rate of 500 ml·min<sup>-1</sup> corresponds to the volume space velocity (GHSV) of 30000 h<sup>-1</sup>. The reaction gas is composed of 500 ppm NO, 500 ppm NH<sub>3</sub> (when used), 6 vol. % O<sub>2</sub>, and the remaining gas is N<sub>2</sub>. The NO concentration at the inlet and outlet of the reactor was obtained by a flue gas analyzer (MRU VarioPlus, Germany). The catalytic activity was calculated by Eq. (1).

$$NO \text{ conversion} = \frac{[NO]_{in} - [NO]_{out}}{[NO]_{in}} \times 100\% \quad \text{Eq. (1)}$$

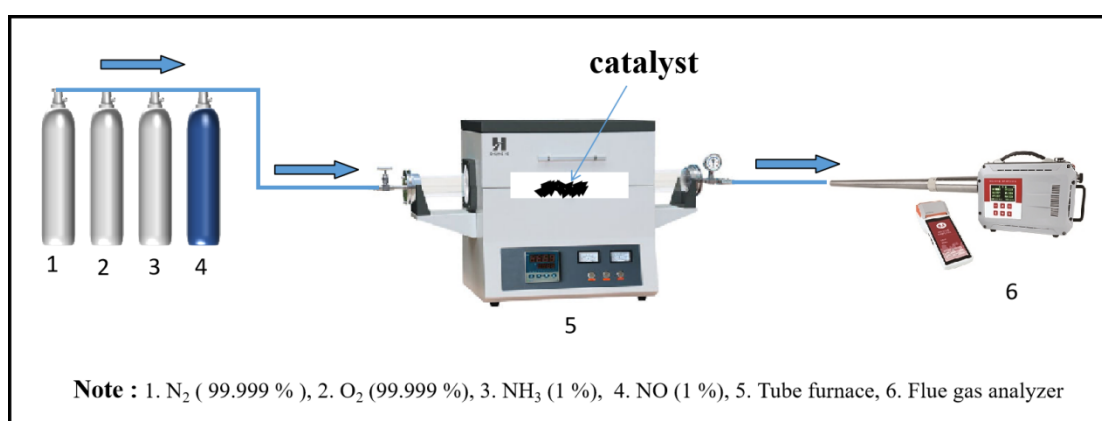

Fig.S1 Catalyst activity evaluation device diagram

Tab. S1 Comparison of the efficiency of transition metal and rare earth metal composite denitrification catalysts

| Catalyst                                               | NO <sub>x</sub> conversion | Temperature | Ref.      |
|--------------------------------------------------------|----------------------------|-------------|-----------|
| 4FeMn <sub>7</sub> Ce <sub>3</sub>                     | 98%                        | 150 °C      | 1         |
| Mn-Ce/FA                                               | 89.4%                      | 250 °C      | 2         |
| MnMoVO <sub>x</sub>                                    | 100%                       | 250 °C      | 3         |
| NbFeMnCeO <sub>x</sub>                                 | 91%                        | 200 °C      | 4         |
| Nb <sub>0.05</sub> Ce <sub>0.05</sub> MnO <sub>x</sub> | >91%                       | 125-250 °C  | 5         |
| 0.1MnCe@FA                                             | 87%                        | 250 °C      | This work |

Tab. S2 Relative element content on the surface of 0.1MC@FA (1)catalyst

| Element | wt. % | $\sigma$ |
|---------|-------|----------|
| Ce      | 42.3  | 0.6      |
| Mn      | 28.6  | 0.5      |
| O       | 27.9  | 0.6      |
| Si      | 0.8   | 0.1      |
| Al      | 0.5   | 0.1      |
| Ti      | 0.0   | 0.0      |

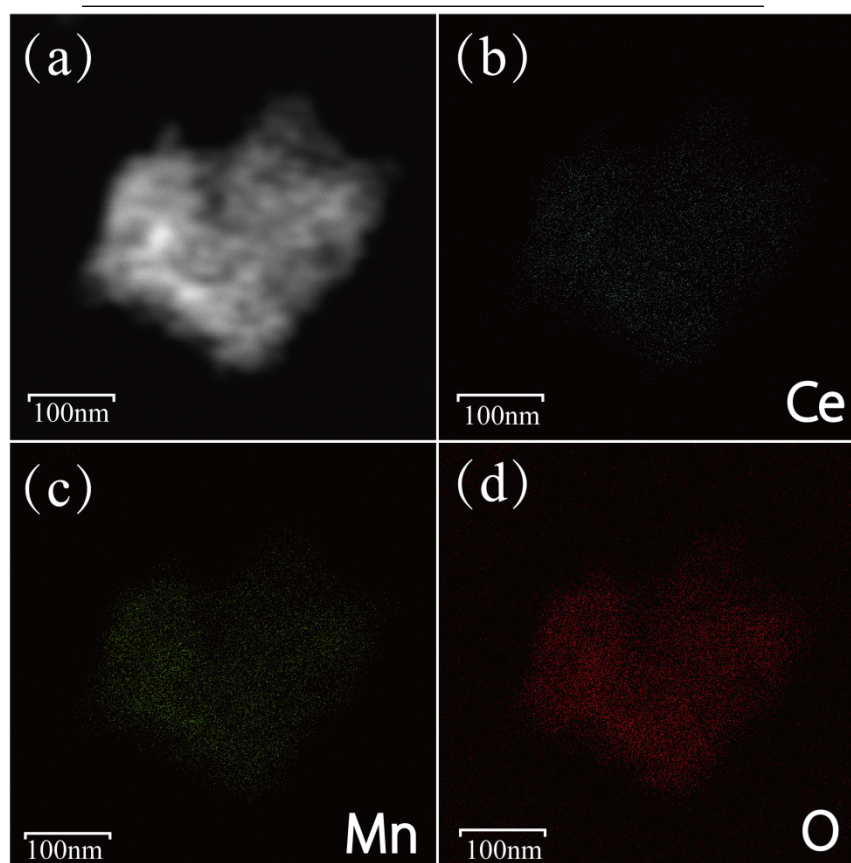

Fig. S2 The elemental mappings of 0.1MC@FA(0) catalysts

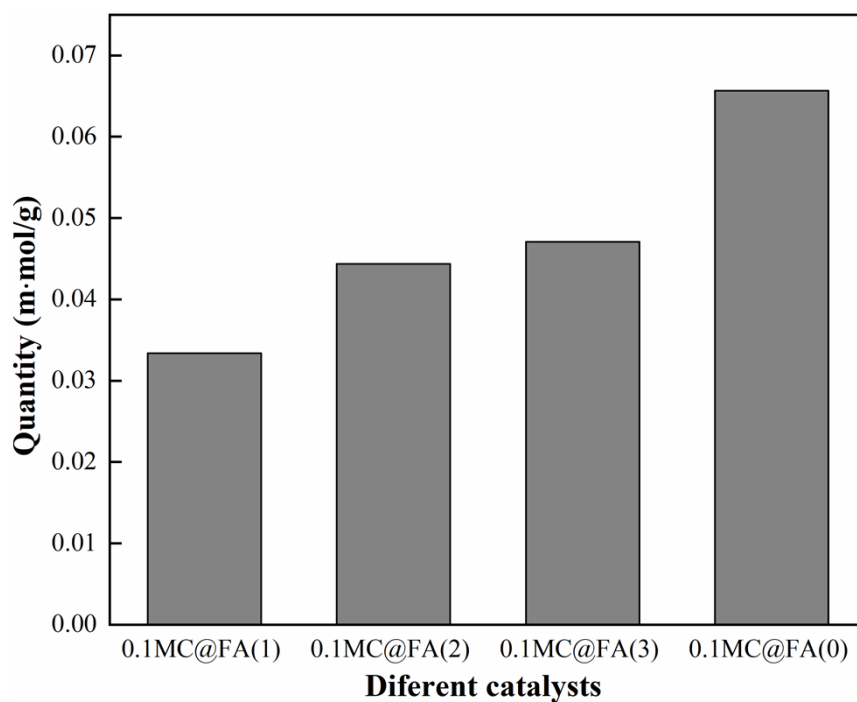

Fig.S3 O<sub>2</sub> adsorption capacity of 0.1MC@FA catalyst

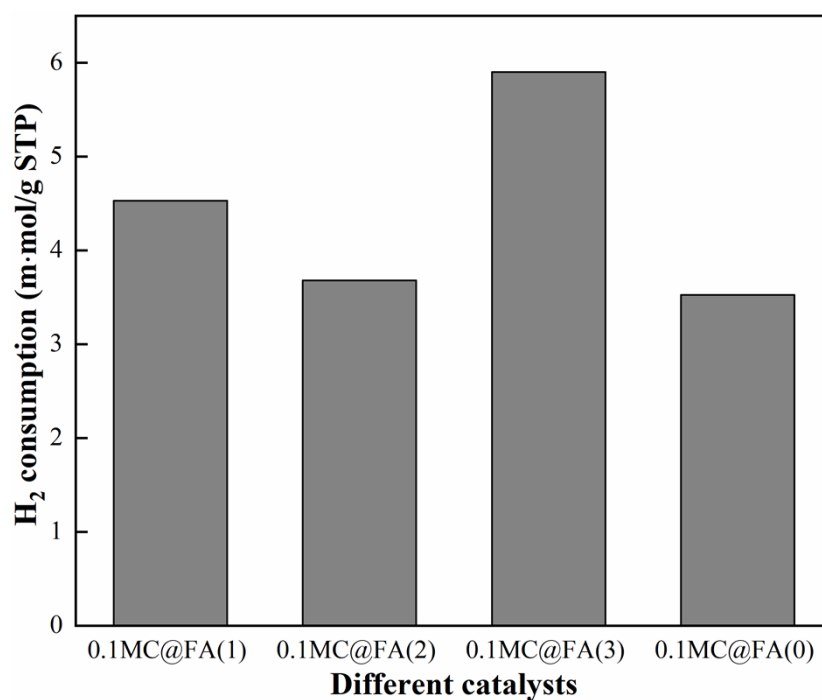

Fig. S4 H<sub>2</sub> consumption of 0.1MC@FA catalyst

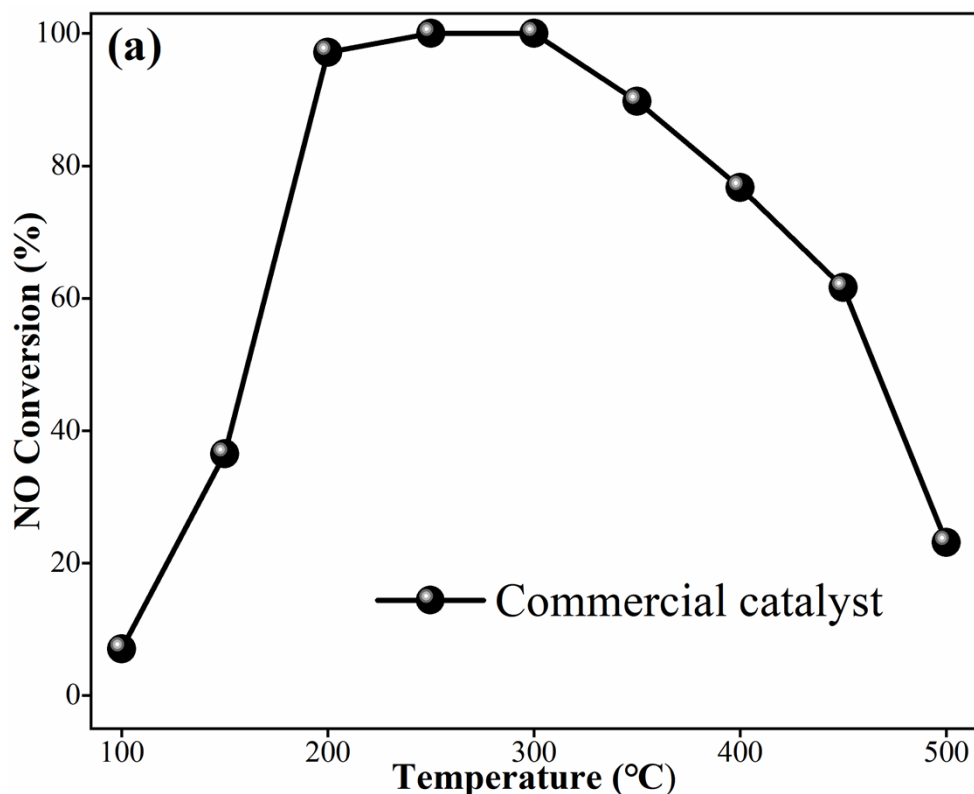

Fig. S5 Denitration efficiency diagram of commercial low temperature denitration catalyst

## Reference

1. S. L. Zhao, J. L. Peng, Y. X. Qian, et al., Low-temperature DeNO<sub>x</sub> characteristics and mechanism of the Fe-doped modified CeMn selective catalytic reduction catalyst, *Fuel Process. Technol.*, 2023, **244**, 107704.
2. P. Zhang, W. H. Yu, B. Gao, et al., Denitration performance and mechanism of Mn-Ce supported alkali-modified fly ash catalysts for NH<sub>3</sub>-SCR, *Fuel*, 2023, **357**, 129878.
3. Y. L. Li, G. B. Li, Y. Zou, et al., Unveiling the remarkable deNO<sub>x</sub> performance of MnMoVO<sub>x</sub> catalysts via dual regulation of the redox and acid sites, *Applied Catalysis B: Environment and Energy*, 2023, **344**, 123612.
4. L. L. Long, S. H. Tian, Y. C. Zhao, et al., Promotional effects of Nb<sup>5+</sup> and Fe<sup>3+</sup> co-doping on catalytic performance and SO<sub>2</sub> resistance of MnO<sub>x</sub>-CeO<sub>2</sub> low-temperature denitration catalyst, *J. Colloid Interface Sci.*, 2023, **645**, 876-888.
5. Y. P. Yang, S. C. Li, S. L. Shi, et al., Enhancing the K-resistance of MnO<sub>x</sub> catalysts via Ce and Nb co-doping for low-temperature NO<sub>x</sub> elimination, *Sep. Purif. Technol.*, 2025, **362**, 131768.
